# Supplementary material for: Heterogeneity in Neutrophil Extracellular Traps from Healthy Human Subjects
Source: MDPI journal article supplement (doi:10.3390/ijms25010525), 2023-12-30
Supplement: s1 [file s1]

**Table S1.** Timing of subject blood donation.

[illegible]
